# Supplementary material for: Internal conversion induced by external electric and magnetic fields
Source: Royal Society of Chemistry journal article supplement (doi:10.1039/d3cp05409h), 2024-01-01
Supplement: d3cp05409h1.pdf [file d3cp05409h1.pdf]

## Internal conversion induced by external electric and magnetic fields

R. R. Valiev,<sup>a</sup> R. T. Nasibullin,<sup>b</sup> B. S. Merzlikin,<sup>b</sup> K. Khoroshkin,<sup>b</sup> V. N. Cherepanov<sup>b</sup>, D. Sundholm<sup>a</sup>

<sup>a</sup>*Department of Chemistry, Faculty of Science, P.O. Box 55*

*(A.I. Virtanens plats 1), FIN-00014 University of Helsinki, Finland*

<sup>b</sup>*Tomsk State University, 36 Lenin Avenue, Tomsk, Russia*

Table S1. Calculated  $S_1$ - $S_0$  electronic excitation energies ( $\text{cm}^{-1}$ ).

|              | ISO    | ICG     | PM567   | 4B      | a-NPO   | BPBD-365 | BM-Terphenyl |
|--------------|--------|---------|---------|---------|---------|----------|--------------|
| $E(S_1-S_0)$ | 7828.9 | 15699.7 | 18333.2 | 21637.1 | 24180.4 | 25663.9  | 29503.5      |

Table S2. Cartesian coordinates ( $\text{\AA}$ ) for  $S_1$  excited state of ISO.

|   |                 |                 |                |
|---|-----------------|-----------------|----------------|
| O | 0.032918304387  | 2.057032475022  | 0.000000000000 |
| O | 2.117223461381  | -0.033358555410 | 0.000000000000 |
| O | -2.117441979358 | 0.033141694393  | 0.000000000000 |
| O | -0.032543854332 | -2.056995486009 | 0.000000000000 |
| C | 0.738563826520  | 4.237256991910  | 0.000000000000 |
| C | -0.604799388804 | 4.258008677412  | 0.000000000000 |
| C | 1.156976877819  | 2.846507482201  | 0.000000000000 |
| C | 2.423148318526  | 2.387948904959  | 0.000000000000 |
| C | -1.065965227220 | 2.880815733658  | 0.000000000000 |
| C | -2.345980787952 | 2.462488734358  | 0.000000000000 |
| C | 2.939520574926  | 1.048263653922  | 0.000000000000 |
| C | -2.905079259416 | 1.140210932602  | 0.000000000000 |
| C | -4.227870887254 | 0.775010640141  | 0.000000000000 |
| C | 4.250047088858  | 0.641341754479  | 0.000000000000 |
| C | 4.227740019233  | -0.774915070148 | 0.000000000000 |
| C | 2.905028988424  | -1.140353020609 | 0.000000000000 |
| C | -4.250320464842 | -0.641108544425 | 0.000000000000 |
| C | -2.939878738969 | -1.048498515962 | 0.000000000000 |
| C | 2.346368447964  | -2.462897531403 | 0.000000000000 |
| C | 1.066180853244  | -2.881037563702 | 0.000000000000 |
| C | -1.156699299798 | -2.846115142145 | 0.000000000000 |
| C | -0.738740468532 | -4.236874881909 | 0.000000000000 |
| C | 0.604675201805  | -4.258013652419 | 0.000000000000 |
| C | -2.423092574518 | -2.387819202980 | 0.000000000000 |
| H | 5.067787079068  | -1.453209057238 | 0.000000000000 |
| H | -5.111478570215 | -1.292401728590 | 0.000000000000 |
| H | 3.088686879725  | -3.253954332672 | 0.000000000000 |
| H | -1.425308867253 | -5.071759833344 | 0.000000000000 |

|   |                 |                 |                |
|---|-----------------|-----------------|----------------|
| H | 1.264636347621  | -5.114077745455 | 0.000000000000 |
| H | -3.189784967043 | -3.155301110551 | 0.000000000000 |
| H | 1.424835313201  | 5.072384902431  | 0.000000000000 |
| H | 3.190436770113  | 3.154833112489  | 0.000000000000 |
| H | 5.111061669191  | 1.292834122654  | 0.000000000000 |
| H | -5.067798157077 | 1.453477159281  | 0.000000000000 |
| H | -3.088266030669 | 3.253660923679  | 0.000000000000 |
| H | -1.265175915635 | 5.113744301398  | 0.000000000000 |

Table S3. Cartesian coordinates (Å) for S<sub>1</sub> excited state of **ICG**.

|   |                  |                 |                 |
|---|------------------|-----------------|-----------------|
| C | 11.689191846703  | 0.426357030897  | -0.011957000876 |
| C | 11.087649803111  | -0.854649061907 | 0.025954001901  |
| C | 9.718443703952   | -0.987945071552 | 0.029063002113  |
| C | 10.900023789528  | 1.553825112554  | -0.046492003354 |
| C | 9.485841687069   | 1.456009105462  | -0.044503003244 |
| C | 8.873130642718   | 0.158531011486  | -0.005717000436 |
| C | 7.309360529453   | 2.572016186302  | -0.079149005731 |
| C | 8.679166628668   | 2.633056190724  | -0.080429005802 |
| N | 5.370588389025   | 0.982605071170  | -0.030297002182 |
| C | 6.724953487123   | 1.285489093118  | -0.040148002916 |
| C | 7.458166540218   | 0.106306007704  | -0.004332000327 |
| C | 6.495367470461   | -1.066411077256 | 0.031448002281  |
| C | 5.148284372919   | -0.358547025968 | 0.012634000932  |
| C | 6.618398479403   | -1.972459142874 | -1.211282087739 |
| C | 6.621385479600   | -1.897838137474 | 1.324727095955  |
| C | 3.906716282953   | -0.981826071141 | 0.035384002551  |
| C | 2.658281192543   | -0.338352024507 | 0.038100002770  |
| C | 1.444277104615   | -1.029489074584 | 0.036829002681  |
| C | 0.189309013721   | -0.408118029577 | 0.036324002641  |
| C | -1.019635073839  | -1.113951080698 | 0.019818001460  |
| C | -2.277979164978  | -0.505697036647 | 0.016270001199  |
| C | -3.473919251614  | -1.242821090039 | -0.012425000895 |
| N | -5.868816425095  | -1.530863110887 | -0.053424003856 |
| C | -4.764979345165  | -0.723516052414 | -0.014246001041 |
| C | -5.209056377323  | 0.733535053112  | 0.028946002082  |
| C | -7.052853510854  | -0.795013057597 | -0.035439002588 |
| C | -6.715320486407  | 0.584928042362  | 0.014533001063  |
| C | -7.692283557169  | 1.536804111311  | 0.041446003004  |
| C | -9.063405656489  | 1.138829082474  | 0.019970001433  |
| C | -9.390675680205  | -0.254923018475 | -0.029503002148 |
| C | -8.359565605530  | -1.231463089180 | -0.057405004141 |
| C | -4.745771343730  | 1.518135109978  | -1.213439087867 |
| C | -4.760202344820  | 1.436469104043  | 1.323992095902  |
| C | -5.806845420617  | -2.981429215956 | -0.106811007744 |
| C | -10.762543779585 | -0.632819045844 | -0.049019003527 |
| C | -11.756705851575 | 0.316833022945  | -0.021065001508 |
| C | -11.430212827915 | 1.694820122736  | 0.027495001981  |
| C | -10.111960732450 | 2.092413151535  | 0.047378003447  |
| H | 12.771499925103  | 0.514890037276  | -0.013761000990 |
| H | 11.714487848499  | -1.741345126112 | 0.052940003844  |
| H | 9.278064672056   | -1.979343143348 | 0.058596004219  |

|   |                  |                 |                 |
|---|------------------|-----------------|-----------------|
| H | 11.349856822115  | 2.543699184248  | -0.076007005496 |
| H | 6.694764484937   | 3.466131251085  | -0.106076007692 |
| H | 9.181466665042   | 3.596776260516  | -0.108990007887 |
| H | 4.640571336109   | 1.687650122227  | -0.061415004451 |
| H | 5.846102423457   | -2.748293199061 | -1.186930085979 |
| H | 7.594655550085   | -2.465180178584 | -1.233974089362 |
| H | 6.502074470987   | -1.390773100748 | -2.130085154265 |
| H | 6.510304471577   | -1.262607091462 | 2.208092159932  |
| H | 5.846753423500   | -2.671360193494 | 1.348985097737  |
| H | 7.596418550234   | -2.391110173173 | 1.372668099437  |
| H | 3.918610283848   | -2.070966149988 | 0.052134003763  |
| H | 2.611086189120   | 0.751059054423  | 0.041036002981  |
| H | 1.476321106955   | -2.120185153570 | 0.031636002289  |
| H | 0.151728011009   | 0.681903049378  | 0.045208003285  |
| H | -0.976805070765  | -2.204349159654 | 0.006070000449  |
| H | -2.307076167100  | 0.581356042114  | 0.033798002454  |
| H | -3.371320244207  | -2.326830168540 | -0.035406002566 |
| H | -7.446404539360  | 2.597140188134  | 0.079760005795  |
| H | -8.627482624907  | -2.283487165377 | -0.093261006762 |
| H | -5.192312376081  | 2.518111182393  | -1.189700086196 |
| H | -3.658694265034  | 1.630883118149  | -1.238961089730 |
| H | -5.066865367026  | 1.018216073774  | -2.131704154383 |
| H | -5.204741376974  | 2.436924176538  | 1.359019098441  |
| H | -5.092807368881  | 0.879460063705  | 2.204566159686  |
| H | -3.673278266083  | 1.544306111858  | 1.369341099207  |
| H | -5.252424380460  | -3.302307239206 | -0.993808071991 |
| H | -5.311436384726  | -3.373076244347 | 0.786778056970  |
| H | -6.815840493672  | -3.386411245269 | -0.157147011363 |
| H | -11.008488797386 | -1.691605122552 | -0.086452006263 |
| H | -12.799282927092 | 0.012106000890  | -0.036358002650 |
| H | -12.223910885393 | 2.435955176423  | 0.049011003532  |
| H | -9.852189713600  | 3.147953228009  | 0.084744006151  |

Table S4. Cartesian coordinates (Å) for S<sub>1</sub> excited states of **PM567**.

|   |                 |                 |                 |
|---|-----------------|-----------------|-----------------|
| F | -0.121449862778 | -2.180331867954 | -1.360455199557 |
| F | 0.190845989831  | -2.357429579751 | 0.901761368314  |
| N | 1.254763807891  | -0.539619326063 | -0.254805914461 |
| N | -1.191573360323 | -0.552155127995 | 0.091414851647  |
| C | 1.228906649025  | 0.874243249331  | -0.203464453748 |
| C | -1.217179226143 | 0.859993444299  | 0.045237858302  |
| C | -0.060674038402 | 1.592809353362  | -0.171809504427 |
| C | -2.450806326521 | -1.011883085303 | 0.306225542167  |
| C | -3.334698780556 | 0.084223304099  | 0.432456266326  |
| C | -2.587766976459 | 1.257212572065  | 0.268601792465  |
| C | 2.524092080824  | 1.302429522362  | -0.183613496294 |
| C | 3.388709465448  | 0.069825559048  | -0.276719033056 |
| C | 2.535408874650  | -1.016429031621 | -0.311751395578 |
| C | -3.132501772890 | 2.649310231884  | 0.378419749436  |
| C | 3.128921960663  | 2.662103588829  | -0.082240349945 |
| C | 2.833343853215  | -2.480054288624 | -0.380679828582 |
| C | -2.743149401675 | -2.473678996189 | 0.348933789282  |

|   |                 |                 |                 |
|---|-----------------|-----------------|-----------------|
| C | -5.626882811564 | 0.076795775566  | -0.648032645950 |
| C | -4.816311354878 | -0.014135249005 | 0.658456960702  |
| C | 5.441742546142  | 0.014529544053  | 1.186557920964  |
| C | 4.874800826086  | 0.062673564536  | -0.255779033533 |
| C | -0.065597701756 | 3.071080403442  | -0.437241220682 |
| B | 0.003266189245  | -1.469637290425 | -0.163586038859 |
| H | -2.501112227151 | 3.290749596335  | 1.002067747570  |
| H | -4.130207932140 | 2.637039043024  | 0.826191750834  |
| H | -3.232297023122 | 3.143828607695  | -0.597624386300 |
| H | 2.414498486911  | 3.428302222309  | 0.208506968090  |
| H | 3.942683382580  | 2.661611043770  | 0.653301785318  |
| H | 3.580732358340  | 2.963329054659  | -1.037909548185 |
| H | 2.261808985817  | -2.945565432365 | -1.188904599121 |
| H | 3.899200633443  | -2.647859451815 | -0.552366212990 |
| H | 2.535199149641  | -2.981385789977 | 0.544651146473  |
| H | -3.805516835649 | -2.660840481736 | 0.513829448221  |
| H | -2.439851842736 | -2.946367675394 | -0.592759069923 |
| H | -2.160366130473 | -2.961893732545 | 1.137189253356  |
| H | -6.702480978486 | 0.003744772281  | -0.453971893907 |
| H | -5.346656761279 | -0.728687715797 | -1.334443759646 |
| H | -5.435311880705 | 1.026666629356  | -1.157831537865 |
| H | -5.141384730390 | 0.782439773669  | 1.339143522021  |
| H | -5.052766287974 | -0.954971493172 | 1.167825951613  |
| H | 6.536058705415  | 0.015077607109  | 1.163804289295  |
| H | 5.102995455628  | -0.889497985453 | 1.699719711118  |
| H | 5.108875698037  | 0.876668758493  | 1.772138677374  |
| H | 5.249516755262  | -0.805179394312 | -0.809196175605 |
| H | 5.262642349211  | 0.957163462339  | -0.758430287916 |
| H | -1.037584657167 | 3.413325661225  | -0.788093304109 |
| H | 0.660690688833  | 3.323147052723  | -1.217629773209 |
| H | 0.190423998810  | 3.674980476202  | 0.447102447395  |

Table S5. Cartesian coordinates (Å) for S<sub>1</sub> excited states of **4B**.

|   |                 |                 |                 |
|---|-----------------|-----------------|-----------------|
| C | 1.671841121091  | 0.566597041037  | -0.092723006700 |
| C | 2.986205216315  | 1.086434078701  | -0.106261007688 |
| C | 3.310457239784  | 2.443825176989  | -0.155872011276 |
| C | 2.203511159590  | 3.350472242678  | -0.196922014276 |
| C | 0.895450064839  | 2.885379208972  | -0.192676013930 |
| C | 0.574105041608  | 1.483294107421  | -0.134768009775 |
| C | -0.818275059266 | 1.367784099082  | -0.134698009732 |
| C | 1.786778129426  | -0.831772060235 | -0.035133002563 |
| C | 3.161095228993  | -1.127976081709 | -0.016215001162 |
| O | 3.896799282280  | 0.035217002572  | -0.059207004283 |
| C | 0.862895062488  | -1.921435139192 | 0.005302000375  |
| C | 1.374762099585  | -3.223402233506 | 0.060958004439  |
| C | 2.746073198899  | -3.539953256414 | 0.079531005769  |
| C | 3.694356267572  | -2.427548175834 | 0.039014002848  |
| C | -0.538517039005 | -2.036244147488 | 0.005725000431  |
| C | -0.831187060184 | -3.403791246548 | 0.061876004461  |
| O | 0.338736024518  | -4.138844299793 | 0.095485006922  |

|   |                 |                 |                 |
|---|-----------------|-----------------|-----------------|
| C | -1.630452118096 | -1.110900080481 | -0.034257002492 |
| C | -2.940068212947 | -1.633202118272 | -0.014314001058 |
| C | -3.250857235455 | -3.001826217443 | 0.041768003021  |
| C | -2.131698154413 | -3.941765285507 | 0.082212005941  |
| C | 3.257033235929  | -4.864121352330 | 0.135419009818  |
| C | 4.612356334081  | -5.097069369218 | 0.151243010959  |
| C | 5.536570401018  | -4.014108290750 | 0.112070008128  |
| C | 5.086988368472  | -2.716812196810 | 0.057482004141  |
| C | -4.578346331632 | -3.513250254495 | 0.061322004460  |
| C | -4.809945348392 | -4.866431352471 | 0.117477008488  |
| C | -3.719371269422 | -5.781442418758 | 0.157086011355  |
| C | -2.419276175240 | -5.331021386162 | 0.139821010134  |
| C | -1.752796126962 | 0.284432020594  | -0.092176006655 |
| C | -3.147650227996 | 0.577205041785  | -0.104867007597 |
| O | -3.860001279596 | -0.617532044727 | -0.056827004100 |
| C | -1.363310098750 | 2.695133195226  | -0.192833013994 |
| C | -2.723502197253 | 2.933851212508  | -0.196530014216 |
| C | -3.683948266825 | 1.857585134573  | -0.154661011208 |
| N | -0.298619021652 | 3.597844260592  | -0.244103017680 |
| C | -0.608024044038 | 7.199161521470  | 1.087887078775  |
| C | -0.478866034689 | 5.674191410980  | 1.142645082753  |
| C | -0.420530030440 | 5.046088365526  | -0.257855018688 |
| H | 2.395718173514  | 4.414443319729  | -0.229097016613 |
| H | 2.552595184886  | -5.690130412180 | 0.165269011956  |
| H | 5.789088419336  | -1.888606136800 | 0.027560001987  |
| H | -5.405149391516 | -2.809676203529 | 0.030817002228  |
| H | -1.589885115174 | -6.031234436835 | 0.170100012300  |
| H | -3.092664224031 | 3.952217286283  | -0.228963016604 |
| H | -0.645757046776 | 7.626792552416  | 2.095150151783  |
| H | 0.242609017588  | 7.654066554420  | 0.565634040946  |
| H | -1.521371110190 | 7.505243543624  | 0.562898040789  |
| H | -1.326049096030 | 5.241575379639  | 1.689542122401  |
| H | 0.425591030848  | 5.390101390445  | 1.694988122754  |
| H | -1.320215095616 | 5.303288384120  | -0.829268060063 |
| H | 0.428000031004  | 5.450042394742  | -0.822019059529 |
| C | 4.765437345163  | 2.936372212710  | -0.162974011820 |
| C | -5.175956374900 | 2.228997161471  | -0.168256012206 |
| C | -6.125899443710 | 1.016002073583  | -0.115413008350 |
| H | -5.988786433800 | 0.351472025476  | -0.972493070428 |
| H | -5.985044433508 | 0.426352030860  | 0.794240057538  |
| H | -7.160870518681 | 1.377211099773  | -0.128615009302 |
| C | -5.488311397516 | 3.016591218490  | -1.466367106209 |
| H | -4.889004354143 | 3.928370284563  | -1.554832112623 |
| H | -5.295265383541 | 2.400553173855  | -2.351541170337 |
| H | -6.545003474076 | 3.309695239733  | -1.479649107172 |
| C | -5.486373397392 | 3.122750226205  | 1.059642076736  |
| H | -5.285593382833 | 2.585775187319  | 1.993276144354  |
| H | -4.893199354449 | 4.042885292828  | 1.067555077346  |

|   |                 |                 |                 |
|---|-----------------|-----------------|-----------------|
| H | -6.544727474061 | 3.410007247001  | 1.053405076308  |
| C | 4.861974352170  | 4.473169324012  | -0.219609015915 |
| H | 4.403838318993  | 4.880790353545  | -1.128065081702 |
| H | 4.390232317987  | 4.946863358338  | 0.649027046997  |
| H | 5.916821428597  | 4.768929345453  | -0.222099016067 |
| C | 5.480087396950  | 2.460459178209  | 1.126885081631  |
| H | 6.521608472384  | 2.805102203196  | 1.125541081540  |
| H | 4.989490361399  | 2.869956207872  | 2.017471146156  |
| H | 5.481171397018  | 1.371075099331  | 1.208453087539  |
| C | 5.498318398274  | 2.365539171349  | -1.403174101656 |
| H | 5.018769363505  | 2.703928195877  | -2.328879168672 |
| H | 6.539124473645  | 2.712184196426  | -1.414631102475 |
| H | 5.502442398551  | 1.273133092226  | -1.400903101455 |
| H | 4.984765361080  | -6.116883443082 | 0.194023014033  |
| H | 6.603393478323  | -4.218664305556 | 0.125535009114  |
| H | -3.919154283881 | -6.848586496041 | 0.201455014590  |
| H | -5.828310422181 | -5.243922379854 | 0.131770009570  |

Table S6. Cartesian coordinates (Å) for  $S_1$  excited states of **a-NPO**.

|   |                 |                 |                 |
|---|-----------------|-----------------|-----------------|
| O | -2.982700239064 | 3.531523500779  | 4.747104158866  |
| N | -3.025648592154 | 4.591865152590  | 2.746756052979  |
| C | -2.987527050388 | 1.082222907374  | -1.358424471386 |
| C | -2.980854070931 | 0.087020921284  | -0.388745957160 |
| C | -2.985128671243 | 2.422933069489  | -0.966192213969 |
| C | -2.979517374810 | 2.769293407578  | 0.393397795497  |
| C | -2.974226370420 | 1.787043357455  | 1.400363900425  |
| C | -2.970768330186 | 0.402177136153  | 0.997097484232  |
| C | -2.971007017225 | 2.080626821700  | 2.831492757119  |
| C | -2.956079585115 | -0.623443328144 | 1.969289662624  |
| C | -2.944129326275 | -0.320710054242 | 3.338362395833  |
| C | -2.951754941781 | 0.993762642970  | 3.766314649804  |
| C | -2.991643771673 | 3.394166509835  | 3.359043846285  |
| C | -3.015704517450 | 4.884203057789  | 4.988940292391  |
| C | -3.041525513295 | 5.504347129671  | 3.733499091424  |
| C | -3.009424400982 | 5.360025642245  | 6.332439019690  |
| C | -2.950131184676 | 4.456717056812  | 7.427835035997  |
| C | -3.056785674437 | 6.754345730250  | 6.608006508653  |
| C | -2.932507440387 | 4.933930902391  | 8.730372069342  |
| C | -3.039245832153 | 7.213959839517  | 7.914559631287  |
| C | -2.975578719552 | 6.310804691091  | 8.986995682941  |
| H | -2.980245698867 | 3.812553765172  | 0.681475314349  |
| H | -2.951953997836 | -1.658629158165 | 1.638583202705  |
| H | -2.929798018211 | -1.124218147414 | 4.068984174728  |
| H | -2.947134957480 | 1.220838865446  | 4.825187007486  |
| H | -2.982636946025 | -0.960334728563 | -0.679172871177 |
| H | -2.988437901437 | 3.210820936565  | -1.713663751132 |
| H | -2.994369721906 | 0.816789247186  | -2.411745429679 |

|   |                 |                |                 |
|---|-----------------|----------------|-----------------|
| H | -2.915877748204 | 3.391054871621 | 7.230810849765  |
| H | -3.107996403128 | 7.463756301625 | 5.787727973210  |
| H | -2.884004627887 | 4.230836444448 | 9.557038289229  |
| H | -3.074275368657 | 8.282349405942 | 8.107194245247  |
| H | -2.960809058464 | 6.677656448695 | 10.008662827950 |
| H | -3.068421961250 | 6.565591300583 | 3.526858420470  |

Table S7. Cartesian coordinates (Å) for S<sub>1</sub> excited states of **BPBD-365**.

|   |                 |                 |                 |
|---|-----------------|-----------------|-----------------|
| O | -2.755019847568 | 2.901120153151  | 3.794907820891  |
| N | -3.424792068064 | 4.586931622250  | 5.110340495165  |
| N | -3.335719462609 | 5.070656215299  | 3.870656877350  |
| C | -3.080208816135 | 3.290192687341  | 5.075109042614  |
| C | -2.931069775288 | 4.061354973200  | 3.068351102247  |
| C | -3.034265801791 | 2.366882625435  | 6.150582071499  |
| C | -3.367550015908 | 2.789302742015  | 7.466603715817  |
| C | -2.664648270031 | 1.007750779007  | 5.954786371310  |
| C | -3.335900029634 | 1.892995698117  | 8.519815553104  |
| C | -2.641240501303 | 0.132813745600  | 7.024032322793  |
| C | -2.976352802572 | 0.539049292044  | 8.337550800922  |
| C | -2.695647448248 | 4.089969772238  | 1.680911198765  |
| C | -2.896428028815 | 5.301728820025  | 0.943643391358  |
| C | -2.257182965509 | 2.931102540303  | 0.966279328980  |
| C | -2.677607411964 | 5.338358613667  | -0.411130926756 |
| C | -2.054056632792 | 2.984764508182  | -0.391479224380 |
| C | -2.257029248461 | 4.183408046023  | -1.142774995767 |
| C | -2.047539398296 | 4.221774626807  | -2.582209206039 |
| C | -1.822741291022 | 5.445288899444  | -3.270959266930 |
| C | -2.060092468235 | 3.035542212876  | -3.366677376853 |
| C | -1.621673357472 | 5.475460575626  | -4.643751680369 |
| C | -1.862791049906 | 3.073913892653  | -4.739619552322 |
| C | -1.640240031800 | 4.292387104916  | -5.393607840661 |
| C | -2.948079516539 | -0.479144178718 | 9.483417839894  |
| C | -3.328078221081 | 0.148971789773  | 10.837632823000 |
| C | -1.524476313397 | -1.078290874082 | 9.611096939170  |
| C | -3.954140003398 | -1.618784082236 | 9.179508987885  |
| H | -3.647173769189 | 3.825066393057  | 7.625900837368  |
| H | -2.405282803206 | 0.664634484148  | 4.959007254193  |
| H | -3.598822549673 | 2.254035247249  | 9.507119310620  |
| H | -2.357602357763 | -0.899064675127 | 6.840046941472  |
| H | -3.237317430502 | 6.181864063787  | 1.477952578035  |
| H | -2.075607887337 | 2.011081549690  | 1.511426104452  |
| H | -2.872795739070 | 6.263315669697  | -0.942673731306 |
| H | -1.689603575385 | 2.097011212869  | -0.896695882970 |
| H | -1.767817388071 | 6.373040402623  | -2.711687890398 |
| H | -2.267001730193 | 2.081963101782  | -2.893074249570 |
| H | -1.438949943237 | 6.426280596497  | -5.136700135081 |
| H | -1.891618996037 | 2.149582866696  | -5.310060064605 |

|   |                 |                 |                 |
|---|-----------------|-----------------|-----------------|
| H | -1.484526851541 | 4.319595652880  | -6.467867952481 |
| H | -3.287640762126 | -0.614528490489 | 11.620943694760 |
| H | -2.639276579167 | 0.950688200860  | 11.123493676725 |
| H | -4.344491586674 | 0.555785789235  | 10.827649125304 |
| H | -0.790439547229 | -0.298905933672 | 9.839442180706  |
| H | -1.498679840578 | -1.818207182716 | 10.419179236671 |
| H | -1.206462088408 | -1.579519321394 | 8.692351239638  |
| H | -3.711941088864 | -2.141838634152 | 8.249660983561  |
| H | -3.943118523603 | -2.356676773678 | 9.989737140566  |
| H | -4.972476252161 | -1.227547791913 | 9.088371260277  |

Table S8. Cartesian coordinates (Å) for S<sub>1</sub> excited states of **BM-Terphenyl**.

|   |                 |                |                 |
|---|-----------------|----------------|-----------------|
| C | -0.560532878577 | 5.114058492452 | 3.270534390887  |
| C | -1.672244744105 | 4.833753036105 | 4.061048206132  |
| C | 0.683678510540  | 5.482202551117 | 3.918485783840  |
| C | -1.638838188720 | 4.883995388739 | 5.460168464508  |
| C | 0.696441847471  | 5.476273231646 | 5.354701062882  |
| C | -0.431487480263 | 5.204306655959 | 6.102457043030  |
| C | 1.894938092264  | 5.844115391303 | 3.225031068596  |
| C | 3.187826653921  | 5.602550792807 | 3.824554557000  |
| C | 1.926219966545  | 6.504616292145 | 1.949421791183  |
| C | 4.361512892934  | 5.955204030381 | 3.209804777497  |
| C | 3.099267246467  | 6.862294808070 | 1.337093044849  |
| C | 4.394100622305  | 6.615789260220 | 1.933098136014  |
| C | 5.602177991774  | 6.977108649395 | 1.233952965400  |
| C | 6.862223023059  | 7.314910936847 | 1.869915178421  |
| C | 5.569170486412  | 7.019647825437 | -0.202408163676 |
| C | 7.962193419753  | 7.609056515126 | 1.068158021374  |
| C | 6.685579218234  | 7.306859561255 | -0.961273485616 |
| C | 7.905415454615  | 7.602145362674 | -0.331302809976 |
| C | -0.689643821949 | 4.923264560592 | 1.778544834814  |
| C | 7.024747047842  | 7.458142158218 | 3.363826620642  |
| H | -2.594882804934 | 4.538909142775 | 3.566284864330  |
| H | -2.530211682274 | 4.655734143243 | 6.036696323248  |
| H | 1.608691485524  | 5.766809229731 | 5.864590787807  |
| H | -0.383795257822 | 5.247493806103 | 7.187086549576  |
| H | 3.236328846437  | 5.039743281068 | 4.750767235122  |
| H | 0.994486901042  | 6.802271707692 | 1.485847675626  |
| H | 5.291563085302  | 5.656071255673 | 3.674723235151  |
| H | 3.048346482779  | 7.431552288309 | 0.415326515084  |
| H | 4.648312498684  | 6.747896242772 | -0.706524590162 |
| H | 8.895880411340  | 7.880192161774 | 1.555479658673  |
| H | 6.618398756375  | 7.295828114460 | -2.045673117195 |
| H | 8.788313116543  | 7.842899688089 | -0.915768794343 |
| H | 0.209981695229  | 4.478130904345 | 1.343802335337  |
| H | -1.536906033337 | 4.267970683128 | 1.556554505721  |
| H | -0.871585221114 | 5.865750693854 | 1.244172402142  |



|   |                |                |                |
|---|----------------|----------------|----------------|
| H | 6.150661713522 | 7.923994780937 | 3.828450640318 |
| H | 7.181101820166 | 6.494929594438 | 3.868455842213 |
| H | 7.899727067217 | 8.075053996889 | 3.587818133886 |

Table S9. Calculated electronic excitation energies (cm<sup>-1</sup>) for n = 1 – 50 singlet states.

| n  | ISO     | ICG     | PM567   | 4B      | a-NPO   | BPBD-365 | BM-Terphenyl |
|----|---------|---------|---------|---------|---------|----------|--------------|
| 1  | 7828.9  | 15699.7 | 18333.2 | 21637.1 | 24180.4 | 25663.9  | 29503.5      |
| 2  | 21554.7 | 18124.0 | 23422.5 | 24053.8 | 29702.7 | 31809.2  | 35677.4      |
| 3  | 25753.4 | 19960.1 | 27821.7 | 24685.3 | 32290.6 | 33180.7  | 35865.9      |
| 4  | 31163.5 | 22829.1 | 36466.6 | 27123.4 | 32900.4 | 34386.9  | 36344.6      |
| 5  | 34256.1 | 25680.3 | 38445.3 | 27916.5 | 34904.2 | 35332.9  | 37068.8      |
| 6  | 35814.6 | 28195.0 | 42605.7 | 28838.7 | 37763.9 | 35700.9  | 40304.1      |
| 7  | 36584.5 | 30225.5 | 44365.7 | 29846.4 | 38400.1 | 35956.2  | 40738.6      |
| 8  | 36629.7 | 30671.4 | 46143.2 | 30237.7 | 38575.6 | 38743.4  | 40878.4      |
| 9  | 37542.8 | 31609.3 | 46424.1 | 30380.4 | 38727.7 | 39058.6  | 42949.6      |
| 10 | 38095.9 | 32259.9 | 47530.0 | 31930.1 | 39845.1 | 39788.3  | 45293.4      |
| 11 | 41137.9 | 33024.5 | 48572.5 | 32485.4 | 42014.7 | 40444.3  | 46784.0      |
| 12 | 41508.9 | 33879.3 | 49131.5 | 33728.7 | 42565.3 | 40861.8  | 47137.4      |
| 13 | 41564.2 | 34906.4 | 49582.8 | 34648.1 | 43898.1 | 41398.4  | 47641.7      |
| 14 | 42021.0 | 35183.8 | 50125.4 | 36066.4 | 45473.2 | 43258.2  | 48392.1      |
| 15 | 42270.2 | 35539.9 | 50282.6 | 36205.7 | 47313.6 | 43795.1  | 48958.8      |
| 16 | 43504.9 | 35955.2 | 51351.2 | 36597.9 | 47617.4 | 44116.1  | 49024.2      |
| 17 | 44686.5 | 36727.2 | 51998.4 | 37578.1 | 47626.9 | 45406.5  | 49263.9      |
| 18 | 44983.0 | 37649.6 | 52073.2 | 37926.1 | 48307.7 | 45958.4  | 49836.4      |
| 19 | 46858.0 | 38086.4 | 52782.2 | 38603.7 | 48993.1 | 46855.2  | 50185.3      |
| 20 | 47742.0 | 38780.8 | 53413.7 | 38738.7 | 49737.7 | 47297.7  | 51194.0      |
| 21 | 48289.0 | 39377.6 | 54260.5 | 39398.8 | 50052.7 | 47913.2  | 51339.2      |
| 22 | 48974.9 | 39692.0 | 54517.5 | 39556.2 | 50430.9 | 48426.7  | 51563.4      |
| 23 | 49138.9 | 40107.9 | 55001.2 | 40334.8 | 50543.2 | 48745.4  | 51639.1      |
| 24 | 49273.1 | 40582.0 | 55387.1 | 40873.8 | 51086.7 | 49395.4  | 52928.9      |
| 25 | 49352.5 | 41073.3 | 55419.6 | 41069.3 | 51767.6 | 49403.4  | 53008.4      |
| 26 | 51276.9 | 41524.8 | 55708.1 | 41514.1 | 52201.0 | 49479.2  | 53513.8      |
| 27 | 51643.8 | 41813.3 | 56283.1 | 42037.9 | 52273.7 | 49559.9  | 53727.6      |
| 28 | 52961.7 | 42306.4 | 57197.5 | 42803.4 | 52639.5 | 49965.2  | 53863.3      |
| 29 | 53036.6 | 42757.5 | 57423.7 | 43253.8 | 53623.4 | 50113.8  | 54216.5      |
| 30 | 53377.3 | 43473.4 | 58075.5 | 44027.0 | 53970.9 | 51097.3  | 56171.6      |
| 31 | 53564.4 | 44231.0 | 58518.9 | 44233.0 | 54043.4 | 51414.2  | 56384.9      |
| 32 | 53566.8 | 44501.1 | 58786.0 | 44512.6 | 54360.8 | 51536.9  | 56882.9      |
| 33 | 53917.3 | 44640.5 | 59200.5 | 44767.7 | 54612.4 | 51892.7  | 57370.1      |
| 34 | 54056.4 | 44733.2 | 59367.9 | 44967.2 | 55578.7 | 51929.8  | 57801.8      |
| 35 | 54376.6 | 45026.5 | 59728.8 | 45339.4 | 55736.8 | 51947.3  | 57840.8      |
| 36 | 54686.8 | 45065.5 | 60153.2 | 45479.2 | 56072.0 | 52922.4  | 57922.4      |
| 37 | 55292.1 | 45089.1 | 61500.2 | 45942.5 | 56832.8 | 53035.7  | 58218.0      |
| 38 | 55620.1 | 45563.2 | 61718.8 | 46102.9 | 56960.4 | 53574.9  | 59503.7      |
| 39 | 55738.5 | 45680.1 | 61853.5 | 46432.4 | 57274.1 | 53854.6  | 59901.6      |
| 40 | 55883.1 | 46423.3 | 62114.5 | 46844.5 | 57798.7 | 53864.7  | 60070.0      |
| 41 | 57322.4 | 47087.1 | 62190.1 | 47157.7 | 58025.1 | 54161.8  | 60451.3      |

|    |         |         |         |         |         |         |         |
|----|---------|---------|---------|---------|---------|---------|---------|
| 42 | 57331.1 | 47285.2 | 62479.2 | 47260.8 | 58726.6 | 54242.1 | 60673.7 |
| 43 | 57718.7 | 47435.9 | 62539.2 | 47491.1 | 59110.9 | 54324.5 | 60785.4 |
| 44 | 57954.6 | 47499.4 | 63305.2 | 47567.3 | 59246.5 | 54452.2 | 61007.9 |
| 45 | 58009.3 | 47770.6 | 63920.1 | 47752.2 | 59504.1 | 54499.7 | 61059.9 |
| 46 | 58033.4 | 47798.4 | 63961.1 | 48129.4 | 60312.9 | 54870.0 | 61298.7 |
| 47 | 58187.7 | 47996.6 | 64282.3 | 48203.8 | 60379.3 | 55116.3 | 62394.7 |
| 48 | 58201.2 | 48076.1 | 64426.3 | 48339.1 | 60481.3 | 55252.3 | 62570.4 |
| 49 | 59183.1 | 48479.9 | 64627.9 | 48429.6 | 60645.0 | 55444.6 | 62765.6 |
| 50 | 59405.7 | 48513.4 | 65099.6 | 48738.3 | 61191.0 | 55777.2 | 62900.0 |
